# Supplementary material for: Determinants of protein function revealed by combinatorial entropy optimization
Source: PubMed Central journal article supplement (PMC2258190; doi:10.1186/gb-2007-8-11-r232), 2007-11-01
Supplement: gb-2007-8-11-r232-S1.pdf [file gb-2007-8-11-r232-S1.pdf]

**Table SI.** Robustness of the top-ranked alignment columns obtained at different values of **A**.

| Alignment <sup>a</sup> | A            | $\Delta S_{\text{opt}}^b$ | $\langle n_{\text{cl}} \rangle^c$ | $P_{10}^d$ | $P_{20}^d$ | $P_{30}^d$ |
|------------------------|--------------|---------------------------|-----------------------------------|------------|------------|------------|
| Kinases                | 0.5          | -178                      | 10.8                              | 8          | 16         | 26         |
|                        | 0.58         | -177                      | 10.5                              | 9          | 16         | 25         |
|                        | 0.63         | -186                      | 11.1                              | 8          | 18         | 26         |
|                        | 0.66         | -182                      | 8.9                               | 10         | 17         | 26         |
|                        | <b>0.68</b>  | <b>-187</b>               | <b>10.8</b>                       | <b>10</b>  | <b>20</b>  | <b>30</b>  |
|                        | 0.71         | -184                      | 11.1                              | 9          | 19         | 25         |
|                        | 0.72         | -186                      | 13                                | 8          | 17         | 26         |
|                        | 0.75         | -184                      | 11.5                              | 8          | 17         | 26         |
|                        | 0.76         | -185                      | 13.4                              | 9          | 18         | 26         |
|                        | 0.8          | -182                      | 13.9                              | 9          | 18         | 25         |
|                        | 0.9          | -169                      | 8                                 | 7          | 13         | 23         |
| Ras                    | 0.6          | -255                      | 13.6                              | 9          | 18         | 27         |
|                        | 0.7          | -264                      | 12.3                              | 9          | 19         | 26         |
|                        | 0.77         | -259                      | 10.5                              | 9          | 18         | 27         |
|                        | <b>0.833</b> | <b>-267</b>               | <b>8.6</b>                        | <b>10</b>  | <b>20</b>  | <b>30</b>  |
|                        | 0.84         | -266                      | 8.2                               | 9          | 20         | 29         |
|                        | 0.85         | -267                      | 8.9                               | 9          | 19         | 30         |
|                        | 0.9          | -249                      | 8.7                               | 8          | 18         | 27         |

<sup>a</sup>Alignment of 390 kinase catalytic domains was taken from the kinase sequence database of Hanks and Quinn [35,36]; alignment of 515 sequences of Ras homologs were taken from HSSP database [34]; <sup>b</sup>Entropy difference are computed by Eq.6 and normalized by a number of columns in the alignment; <sup>c</sup> $\langle n_{\text{cl}} \rangle$  stands for an average number of sequences in a cluster; <sup>d</sup> $P_{10}$ ,  $P_{20}$ ,  $P_{30}$  are the numbers of top-ranked columns that are commonly determined for a given and for the minimal entropy clustering; the numbers of the common columns are computed for the 10, 20 and 30 top ranked positions; the optimal clustering data are highlighted.
